# Supplementary material for: The Expression and Regulatory Roles of Long Non-Coding RNAs in Periodontal Ligament Cells: A Systematic Review
Source: MDPI journal article supplement (doi:10.3390/biom12020304), 2022-02-12
Supplement: s1 [file s1]

| Section and topic           | No. | Quality criteria                                                                           | Yes | No |
|-----------------------------|-----|--------------------------------------------------------------------------------------------|-----|----|
| Title/keywords/introduction | 1   | Was the study hypothesis/aim/objective clearly described?                                  |     |    |
| Method                      | 2   | Were the experimental designs in the study well described?                                 |     |    |
|                             | 3   | Were the methods and materials in the study well described?                                |     |    |
|                             | 4   | Were the time-points of data collection in the study clearly defined?                      |     |    |
|                             | 5   | Were the main outcomes of measurements in the study clearly defined?                       |     |    |
|                             | 6   | Were the experimental groups comprehensively compared with the control group in the study? |     |    |
| Discussion                  | 7   | Were the results in the study well described?                                              |     |    |
|                             | 8   | Were the limitations of the study discussed?                                               |     |    |

[illegible]
